# Supplementary material
Source: MDPI journal article supplement (https://www.mdpi.com/2218-0532/83/1/125)
Supplement: s1 [file s1]

## Supporting Information to

**Linking a Pharmaceutical Chemistry Workshop to Pharmacy Practice****Jordi MORRAL, Margaret CULSHAW, Kim MORRAL,  
Barbara CONWAY, Sylvia ADAMS, Andrew ADAMS**

Published in Sci Pharm. 2015; 83: 125–142

doi:10.3797/scipharm.1410-03

Available from: <http://dx.doi.org/10.3797/scipharm.1410-03>© Morral *et al.*; licensee Österreichische Apotheker-Verlagsgesellschaft m. b. H., Vienna, Austria.

This is an Open Access article distributed under the terms of the Creative Commons Attribution License (<http://creativecommons.org/licenses/by/3.0/>), which permits unrestricted use, distribution, and reproduction in any medium, provided the original work is properly cited.

**Table of Contents**

- Tab. S1.** Results of self-completion questionnaire administered to students before and after the workshop
- Tab. S2.** Online post-workshop survey for year-two pharmacy students

**Tab. S1.** Results of self-completion questionnaire administered to students before and after the workshop (N = 66 before the workshop and N=61 after the workshop)<sup>a</sup>

| Survey item <sup>b</sup> | Strongly agree No. <sup>c</sup> |                      | Agree No. <sup>c</sup> |               | Neither agree nor disagree No. <sup>c</sup> |              | Disagree No. <sup>c</sup> |               | Strongly disagree No. <sup>c</sup> |               | Not known / No response No. <sup>c</sup> |              |
|--------------------------|---------------------------------|----------------------|------------------------|---------------|---------------------------------------------|--------------|---------------------------|---------------|------------------------------------|---------------|------------------------------------------|--------------|
|                          | <i>Before</i>                   | <b>After</b>         | <i>Before</i>          | <b>After</b>  | <i>Before</i>                               | <b>After</b> | <i>Before</i>             | <b>After</b>  | <i>Before</i>                      | <b>After</b>  | <i>Before</i>                            | <b>After</b> |
| 1)                       | 18<br>(27.3%)                   | <b>52</b><br>(85.2%) | 36<br>(54.5%)          | 8<br>(13.1%)  | 8<br>(12.1%)                                | 0<br>(0%)    | 1<br>(1.5%)               | 1<br>(1.6%)   | 3<br>(4.54%)                       | 0<br>(0%)     | 0<br>(0%)                                | 0<br>(0%)    |
| 2)                       | 20<br>(30.3%)                   | <b>49</b><br>(80.3%) | 29<br>(43.9%)          | 9<br>(14.7%)  | 13<br>(19.7%)                               | 2<br>(3.3%)  | 3<br>(4.5%)               | 0<br>(0%)     | 1<br>(1.5%)                        | 0<br>(0%)     | 0<br>(0%)                                | 1<br>(1.6%)  |
| 3)                       | 37<br>(56.1%)                   | <b>42</b><br>(68.8%) | 28<br>(42.4%)          | 19<br>(31.1%) | 1<br>(1.5%)                                 | 0<br>(0%)    | 0<br>(0%)                 | 0<br>(0%)     | 0<br>(0%)                          | 0<br>(0%)     | 0<br>(0%)                                | 0<br>(0%)    |
| 4)                       | 1<br>(1.5%)                     | <b>2</b><br>(3.3%)   | 6<br>(9.09%)           | 1<br>(1.6%)   | 15<br>(22.7%)                               | 6<br>(9.8%)  | 36<br>(54.5%)             | 26<br>(42.6%) | 8<br>(12.1%)                       | 26<br>(42.6%) | 0<br>(0%)                                | 0<br>(0%)    |
| 5)                       | 1<br>(1.5%)                     | <b>15</b><br>(24.6%) | 13<br>(19.7%)          | 8<br>(13.1%)  | 18<br>(27.3%)                               | 2<br>(3.3%)  | 24<br>(36.4%)             | 17<br>(27.9%) | 9<br>(13.6%)                       | 18<br>(29.5%) | 1<br>(1.5%)                              | 1<br>(1.6%)  |
| 6)                       | 54<br>(81.8%)                   | <b>57</b><br>(93.4%) | 10<br>(15.1%)          | 3<br>(4.9%)   | 0<br>(0%)                                   | 0<br>(0%)    | 2<br>(3%)                 | 0<br>(0%)     | 0<br>(0%)                          | 0<br>(0%)     | 0<br>(0%)                                | 1<br>(1.6%)  |
| 7)                       | 7<br>(10.6%)                    | <b>35</b><br>(57.4%) | 35<br>(53%)            | 23<br>(37.7%) | 23<br>(34.8%)                               | 2<br>(3.3%)  | 1<br>(1.5%)               | 0<br>(0%)     | 0<br>(0%)                          | 0<br>(0%)     | 0<br>(0%)                                | 1<br>(1.6%)  |
| 8)                       | 30<br>(45.45%)                  | <b>32</b><br>(52.5%) | 34<br>(51.5%)          | 18<br>(29.5%) | 0<br>(0%)                                   | 3<br>(4.9%)  | 0<br>(0%)                 | 2<br>(3.3%)   | 0<br>(0%)                          | 2<br>(3.3%)   | 2<br>(3%)                                | 4<br>(6.6%)  |
| 9)                       | 1<br>(1.5%)                     | <b>5</b><br>(8.2%)   | 20<br>(30.3%)          | 3<br>(4.9%)   | 10<br>(15.1%)                               | 4<br>(6.6%)  | 27<br>(40.1%)             | 23<br>(37.7%) | 7<br>(10.6%)                       | 24<br>(39.3%) | 1<br>(1.5%)                              | 2<br>(3.3%)  |
| 10)                      | 7<br>(10.6%)                    | <b>30</b><br>(49.2%) | 26<br>(39.4%)          | 25<br>(40.1%) | 17<br>(25.7%)                               | 6<br>(9.8%)  | 7<br>(10.6%)              | 0<br>(0%)     | 4<br>(6.1%)                        | 0<br>(0%)     | 5<br>(7.6%)                              | 0<br>(0%)    |

<sup>a</sup> Values listed indicate the number and the percentage of students providing this response to the overall students that completed the questionnaire. Likert Scale 5 = strongly agree to 1= strongly disagree. Overall mean response is listed in parenthesis. <sup>b</sup> The survey items correspond to the questions depicted in plain text. <sup>c</sup> The number displayed in italics indicates the answers before the workshop while the number displayed in bold indicates the answers after the workshop.

**Tab. S2.** Online post-workshop survey for year-two pharmacy students (N=21)<sup>a</sup>

| Survey item                                                                                             | No. | %      |
|---------------------------------------------------------------------------------------------------------|-----|--------|
| 1) On a scale of 1–5 where 5 is excellent, how would you rate the workshop overall?                     |     |        |
| 1:                                                                                                      | 1   | 4.80%  |
| 2:                                                                                                      | 0   | 0.00%  |
| 3:                                                                                                      | 2   | 9.50%  |
| 4:                                                                                                      | 10  | 47.60% |
| 5:                                                                                                      | 8   | 38.10% |
| 2) How would you rate the learning opportunities provided (5 = excellent)                               |     |        |
| 1:                                                                                                      | 0   | 0.00%  |
| 2:                                                                                                      | 1   | 4.80%  |
| 3:                                                                                                      | 0   | 0.00%  |
| 4:                                                                                                      | 12  | 57.10% |
| 5:                                                                                                      | 8   | 13.10% |
| 3) Would you welcome similar integrated workshops                                                       |     |        |
| Yes:                                                                                                    | 21  | 100%   |
| No:                                                                                                     | 0   | 0%     |
| Don't care:                                                                                             | 0   | 0%     |
| 4) Was the length (2 h) right?                                                                          |     |        |
| Right:                                                                                                  | 15  | 71.40% |
| Too short:                                                                                              | 3   | 14.30% |
| Too long:                                                                                               | 3   | 14.30% |
| 5) The workshop gave me the opportunity to learn more about the origin of drugs                         |     |        |
| Yes – I learned a lot:                                                                                  | 17  | 81%    |
| Yes – I learned a little:                                                                               | 4   | 19%    |
| No:                                                                                                     | 0   | 0.00%  |
| 6) The workshop helped me to learn more about the chemical nature and properties of drugs               |     |        |
| Yes – I feel much more knowledgeable:                                                                   | 14  | 66.70% |
| Yes – A little:                                                                                         | 7   | 33.30% |
| No:                                                                                                     | 0   | 0.00%  |
| 7) The workshop helped me with some numerical principles such as mmol and ppm                           |     |        |
| Yes – very helpful:                                                                                     | 14  | 66.70% |
| Yes – but I still need more support:                                                                    | 7   | 33.30% |
| No:                                                                                                     | 0   | 0.00%  |
| 8) The workshop helped me to understand where to look for information I need                            |     |        |
| Yes:                                                                                                    | 14  | 66.70% |
| No:                                                                                                     | 7   | 33.30% |
| 9) The workshop helped to appreciate the overall integration of subject matter across the curriculum    |     |        |
| Yes – definitively:                                                                                     | 13  | 61.90% |
| Yes – quite helpful:                                                                                    | 8   | 38.10% |
| No:                                                                                                     | 0   | 0.00%  |
| 10) Please make any other comment (good or bad) you think would help us when planning future workshops. |     |        |

<sup>a</sup> Values listed indicate the number and the percentage of students providing this response online. Likert Scale 5 = strongly agree to 1= strongly disagree.
